# Supplementary material for: Central Arctic Ocean surface-atmosphere exchange of CO 2 and CH 4 constrained by direct measurements
Source: Copernicus journal article supplement (doi:10.5194/bg-2023-82), 2023-05-22
Supplement: Supplementary file 1 [file bg-2023-82-supplement.pdf]

# Supplementary material for: Central Arctic Ocean surface-atmosphere exchange of CO<sub>2</sub> and CH<sub>4</sub> constrained by direct measurements

John Prytherch<sup>1,2</sup>, Sonja Murto<sup>1,2</sup>, Ian Brown<sup>3</sup>, Adam Ulfsbo<sup>4</sup>, Brett F. Thornton<sup>2,5</sup>, Volker Brüchert<sup>2,5</sup>,  
5 Michael Tjernström<sup>1,2</sup>, Anna Lunde Hermansson<sup>6</sup>, Amanda T. Nylund<sup>6</sup>, Lina A. Holthusen<sup>7</sup>

<sup>1</sup>Department of Meteorology, Stockholm University, Stockholm, 10691, Sweden

<sup>2</sup>Bolin Centre for Climate Research, Stockholm, 10691, Sweden

<sup>3</sup>Plymouth Marine Laboratory, Plymouth, PL1 3DH, United Kingdom

<sup>4</sup>Department of Marine Sciences, University of Gothenburg, Gothenburg, 41319, Sweden

10 <sup>5</sup>Department of Geological Sciences, Stockholm University, Stockholm, 10691, Sweden

<sup>6</sup>Department of Mechanics and Maritime Sciences, Chalmers University of Technology, Gothenburg, 41296, Sweden

<sup>7</sup>Institute for Chemistry and Biology of the Marine Environment, University of Oldenburg, Oldenburg, 26129, Germany

*Correspondence to:* John Prytherch (john.prytherch@misu.su.se)

## 15 **1 *pCO<sub>2w</sub>* and *pCH<sub>4w</sub>* measurements**

For both *pCO<sub>2w</sub>* and *pCH<sub>4w</sub>*, a merged dataset is created by averaging syringe and bottle measurements from the same location and similar times (sample times within 1 hour). Figure S1 shows all measurements prior to averaging.

Syringe samples have consistently higher *pCH<sub>4w</sub>* than bottle samples. This could be due to a sharp near surface gradient and the syringes sampling at a shallower depth (upper few cm) than the bottles (approximately 10 cm depth). This  
20 though would suggest a higher surface oversaturation. Furthermore, there is a similar disagreement between the bottle and syringe measurements during overside sampling, where water is sampled from a bucket within which any gradient is likely mixed out. The syringe-bottle difference could be due to accidental intake of ice into the bottle during sampling, lowering any measured dissolved gas concentration, but this was avoided where possible. The difference is likely from some other sampling bias between the two methods or error from the differing analyses performed on the samples.

## 25 **2 Freeze onset date**

The local time of freeze-onset was determined from surface skin temperature measurements from the KT15 IR following the methods of Rigor et al. (2000) and Mortin et al. (2013) (Fig. S2). A threshold of either -1°C or -2°C is applied to the 14-day median filtered temperature. Using the -1°C threshold, the freeze onset occurs August 16. Temperatures increase noticeably after this date, and the -2°C threshold, which gives the freeze onset as August 25, appears to better represent  
30 the regime shift.

### 3. Eddy covariance gas flux measurements

Measurements of surface atmosphere CO<sub>2</sub> and CH<sub>4</sub> flux were also made throughout the expedition from an eddy covariance (EC) system installed on Oden's foremast. This system comprises a Metek uSonic-3 heated anemometer at mast top (20.3 m above mean sea level) alongside an inlet through which air is drawn down to a LGR Fast Greenhouse Gas Analyser, sampling at 10Hz. The airstream is dried using a Nafion drier prior to sampling. Transit time is approximately 5.6 seconds. Corrections are applied for platform motion, airflow distortion and high frequency signal loss and the corrections and system are described in more detail in Prytherch et al. (2017).

Post-cruise analysis of the EC system determined that fluxes in sea-ice regions were in general below the limit of detection of this system: An artificial time lag of 150 s was used to decorrelate the vertical wind and gas mixing ratio prior to flux calculation. The standard deviation of the resulting fluxes, shown in Fig. S3 below, gives a measure of the noise level in the system. Averaging of fluxes within a time window reduces the noise level, as per Dong et al., 2021b (Fig. S4), but the system remains too insensitive to measure the fluxes encountered during SAS. The noise levels determined here (CO<sub>2</sub> 16 mmols m<sup>-2</sup> day<sup>-1</sup>; CH<sub>4</sub> 52 μmol m<sup>-2</sup> day<sup>-1</sup>) provide an upper constraint on the magnitude of the surface-atmosphere fluxes during SAS.

45

a)

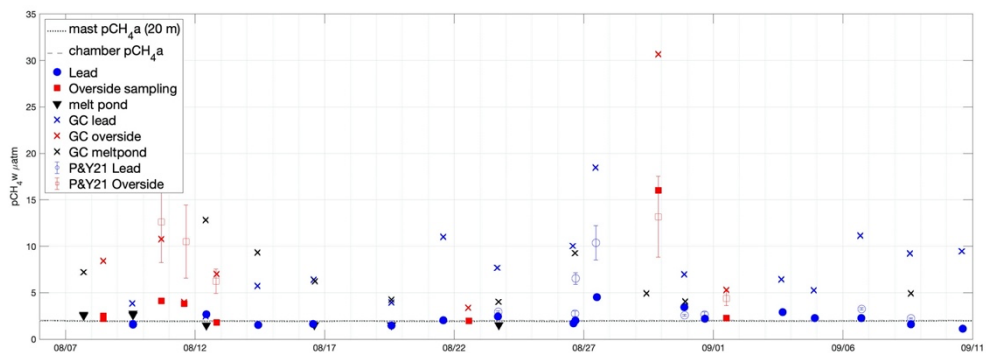

b)

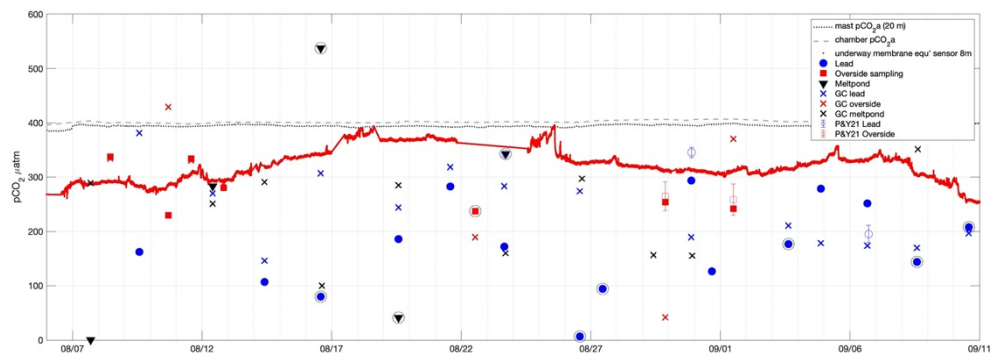

50 **Figure S1.** Time series of partial pressures of a) CH<sub>4</sub> and b) CO<sub>2</sub> in near-surface atmosphere and water during SAS2021. Solid markers show dissolved partial pressures determined from surface samples; outline markers show partial pressures determined using Eq. (1) and the parameterisation of Prytherch and Yelland (2021), excluding unphysical negative partial pressures. Colours indicate the location from which the sample was taken. GC measurements, shown as crosses, refer to the syringe-based measurements.

55

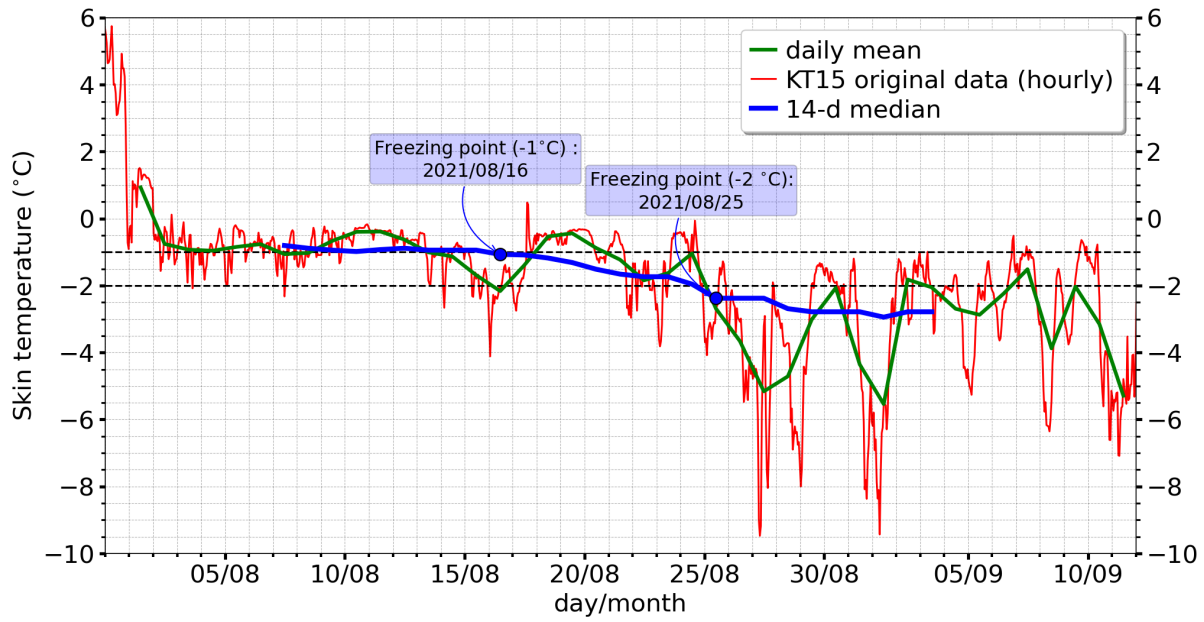

Figure S2. Surface temperature during SAS2021 measured with IR sensors onboard *Oden*, averaged to hourly and daily values, and with a 14-day running median.

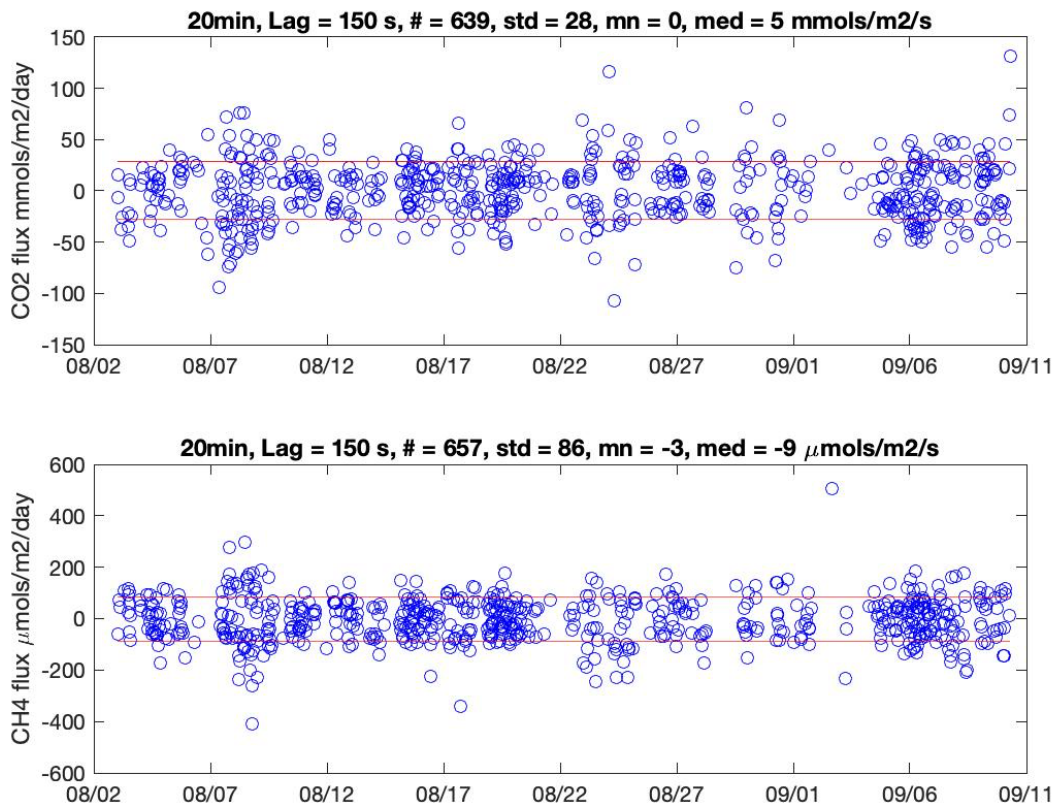

60 **Figure S3. Noise level for the foremast cavity-enhanced spectrometer determined during SAS2021. Noise is determined by calculating 20-minute duration fluxes with a time lag of 150 s imposed on the spectrometer measurements relative to the vertical wind. The noise is then estimated as the standard deviation of these ‘null’ fluxes, shown as the horizontal lines.**

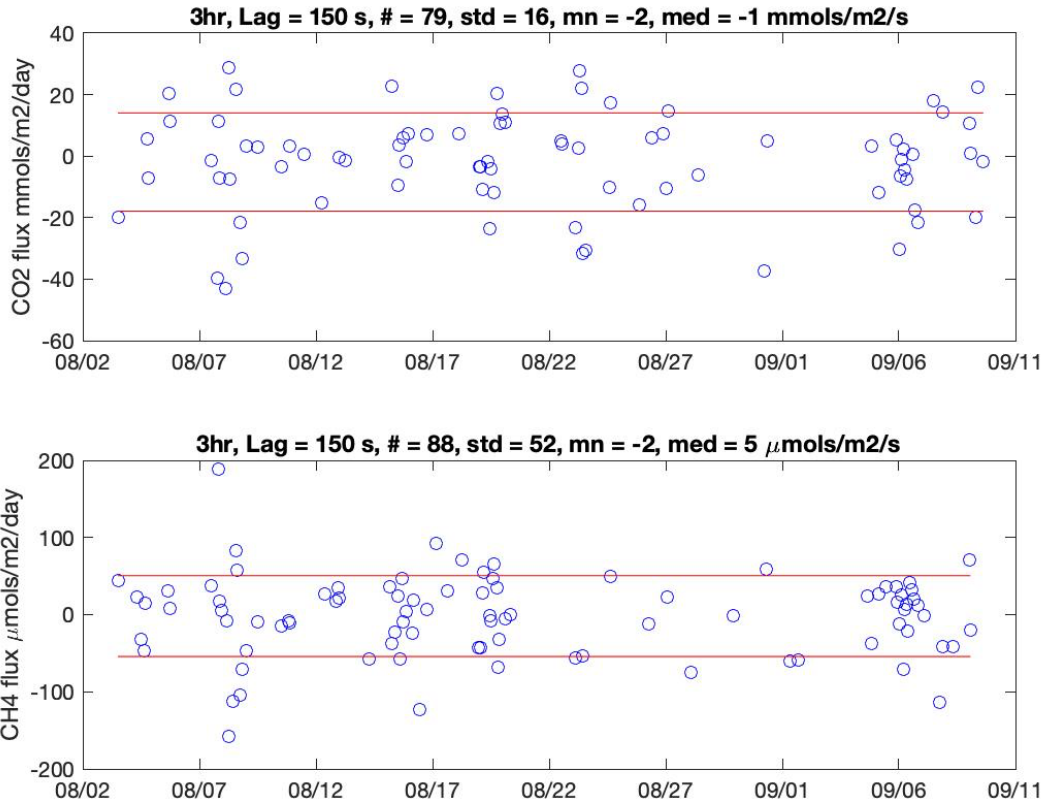

Figure S4. Noise level as per Fig. S3 determined for 3-hourly averages of the 20-minute fluxes.

| Lat °                   | Lon °  | Date | T °C | S    | U m s <sup>-1</sup> | Width m | pCO <sub>2w</sub> $\mu$ atm | pCH <sub>4w</sub> $\mu$ atm | # samples | F <sub>CO<sub>2</sub></sub> mmol m <sup>-2</sup> day <sup>-1</sup> | F <sub>CH<sub>4</sub></sub> $\mu$ mol m <sup>-2</sup> day <sup>-1</sup> |
|-------------------------|--------|------|------|------|---------------------|---------|-----------------------------|-----------------------------|-----------|--------------------------------------------------------------------|-------------------------------------------------------------------------|
| <b>LGR ice-based</b>    |        |      |      |      |                     |         |                             |                             |           |                                                                    |                                                                         |
| 89.92                   | 67.5   | 8/16 | -1.6 | 30.8 | 2.3                 | 30      | 194                         | 4                           | 7         | -2.7 ± 0.3                                                         | -                                                                       |
| 89.11                   | -150   | 8/19 | -0.2 | 1.2  | 5                   | 7.5     | 216                         | 2.7                         | 10        | -6.2 ± 1.7                                                         | -                                                                       |
| 88.65                   | -129.3 | 8/23 | -1.8 | 30.2 | 10.8                | 7.5     | 229                         | 5.1                         | 7         | -6.6 ± 0.5                                                         | 3.2 ± 0.3                                                               |
| 87.86                   | -86.8  | 8/26 | -1.2 | 28   | 5.5                 | 12      | 141                         | 4.6                         | 6         | -7.3 ± 0.4                                                         | 0.6 ± 0.3                                                               |
| 87.85                   | -86.7  | 8/26 | -1.7 | 24.7 | 5.6                 | 33      | 141                         | 4.6                         | 6         | -7.1 ± 0.7                                                         | 3.4 ± 0.5                                                               |
| 87.83                   | -85.5  | 8/27 | -1.6 | 28.8 | 3.7                 | 33      | 163                         | 11.5                        | 6         | -3.4 ± 0.4                                                         | 1.6 ± 0.4                                                               |
| 86.52                   | -57.3  | 8/30 | -1.6 | 29.5 | 5.1                 | 5       | 244                         | 5.2                         | 8         | -2.5 ± 0.4                                                         | 0.7 ± 0.1                                                               |
| 86.49                   | -56.1  | 8/31 | -1.7 | 29.7 | 6.9                 | 5       | 129                         | 2.2                         | 5         | -3.5 ± 0.8                                                         | 0.9 ± 0.4                                                               |
| 84.92                   | -33.5  | 9/3  | -1.2 | 25.8 | 1.6                 | 50      | 196                         | 4.7                         | 8         | -4.8 ± 0.3                                                         | -                                                                       |
| 84.16                   | -32.3  | 9/4  | -1.7 | 30.3 | 4                   | 5       | 231                         | 3.8                         | 6         | -1.5 ± 0.3                                                         | -                                                                       |
| 84.52                   | -24.5  | 9/6  | -1.8 | 29.9 | 5.9                 | 30      | 215                         | 6.7                         | 8         | -6.6 ± 0.5                                                         | 1.2 ± 0.1                                                               |
| 83.86                   | -2.6   | 9/8  | -1.3 | 20.4 | 7.3                 | 1       | 160                         | 5.4                         | 8         | -3.2 ± 0.1                                                         | 0.6 ± 0.1                                                               |
| 82.46                   | 9.1    | 9/10 | -1.9 | 32   | 8.2                 | 1       | 204                         | 5.3                         | 8         | -7.9 ± 1.9                                                         | -                                                                       |
| <b>L17200 ice-based</b> |        |      |      |      |                     |         |                             |                             |           |                                                                    |                                                                         |
| 88.99                   | 24.9   | 8/12 | -1.8 | 30.1 | 6.5                 | 80      | 270                         | -                           | 6         | -6.7 ± 2.7                                                         | -                                                                       |
| 89.61                   | 16.8   | 8/14 | -0.9 | 15.8 | 1.6                 | 30      | 129                         | -                           | 7         | -4.1 ± 0.7                                                         | -                                                                       |
| 89.11                   | -150   | 8/19 | -0.2 | 1.2  | 4.9                 | 7.5     | 216                         | -                           | 8         | -4.6 ± 0.6                                                         | -                                                                       |
| 88.74                   | -137.1 | 8/21 | -1.6 | 29.8 | 3.5                 | 5       | 303                         | -                           | 5         | -2.7 ± 0.4                                                         | -                                                                       |
| <b>LGR overdrive</b>    |        |      |      |      |                     |         |                             |                             |           |                                                                    |                                                                         |
| 86.39                   | 32.1   | 8/8  | -1.6 | 32.9 | 10.6                | 30      | 339                         | 4.4                         | 10        | -20.7 ± 1.1                                                        | -                                                                       |
| 86.4                    | 32.4   | 8/8  | -1.7 | 32.8 | 11.6                | 10      | 339                         | 4.4                         | 6         | -19.9 ± 0.9                                                        | -                                                                       |
| 88.04                   | 29.5   | 8/10 | -0.4 | 28.2 | 3.9                 | 20      | 331                         | 7.4                         | 7         | -19.1 ± 2.4                                                        | 8.5 ± 3.5                                                               |
| 88.49                   | 28.9   | 8/11 | -1.2 | 32.1 | 2.6                 | 5       | 335                         | 3.9                         | 10        | -12.6 ± 1.9                                                        | 2.2 ± 1                                                                 |
| 88.95                   | 23     | 8/12 | -1.1 | 31.3 | 5.6                 | 8       | 286                         | 4.4                         | 7         | -15.6 ± 1.4                                                        | 4.9 ± 1.5                                                               |
| 88.52                   | -129.1 | 8/22 | -1   | 23   | 1.8                 | 5       | 216                         | 2.7                         | 9         | -3.5 ± 0.5                                                         | -                                                                       |
| 87.34                   | -63.2  | 8/29 | -1.6 | 29.7 | 5.1                 | 10      | 150                         | 16                          | 6         | -6.7 ± 1.3                                                         | 16.3 ± 6.3                                                              |
| 86.28                   | -43.1  | 9/1  | -1.9 | 29.8 | 4.1                 | 10      | 309                         | 3.8                         | 8         | -3.4 ± 0.7                                                         | 1.7 ± 0.5                                                               |

70

75

80

85

90

95

100

Table S1. Air-water flux measurements made with floating chamber systems, location and date, water surface temperature, salinity, 10 m wind speed, lead width, and dissolved gas partial pressures. Flux uncertainties are the standard error of the flux samples within each measurement period.

| Lat °               | Lon °  | Date | T °C | Floe z m | Snow z m | Freeboard m | # samples | F <sub>CO2</sub> mmol m <sup>-2</sup> day <sup>-1</sup> |
|---------------------|--------|------|------|----------|----------|-------------|-----------|---------------------------------------------------------|
| <b>Snow surface</b> |        |      |      |          |          |             |           |                                                         |
| 86.30               | 30.6   | 8/7  | 0.2  | 1.8      | 0.05     | -           | 4         | -2.9 ± 1.2                                              |
| 87.05               | 31.2   | 8/9  | 0.4  | 1.2      | 0.05     | -           | 5         | -0.1 ± 0.1                                              |
| 88.99               | 24.9   | 8/12 | 0.2  | 2.5      | 0.05     | -           | 4         | -2.2 ± 1.3                                              |
| 89.61               | 16.8   | 8/14 | 0.0  | 1.3      | 0.08     | 0.16        | 4         | 0.2 ± 0.2                                               |
| 89.11               | -150.0 | 8/19 | 0.0  | 1.6      | 0.12     | 0.29        | 2         | 0                                                       |
| 88.74               | -137.1 | 8/21 | 0.1  | 3        | 0.1      | 0.4         | 2         | -2.9                                                    |
| 88.65               | -129.4 | 8/23 | 0.0  | 1.6      | 0.09     | 0.15        | 2         | -0.6                                                    |
| 87.86               | -86.8  | 8/26 | -1.6 | 2.4      | 0.08     | 0.19        | 3         | 0                                                       |
| 86.52               | -57.3  | 8/30 | -1.1 | 2.0      | 0.09     | 0.23        | 2         | 0                                                       |
| 86.49               | -56.1  | 8/31 | -    | 1.4      | 0.09     | -           | 3         | -1.6 ± 0.3                                              |
| 84.93               | -33.5  | 9/3  | -0.0 | 2.4      | 0.08     | 0.19        | 3         | -0.7 ± 0.4                                              |
| 84.16               | -32.3  | 9/4  | -2.6 | 1.6      | 0.1      | 0.18        | 3         | -2.8 ± 1.5                                              |
| 84.52               | -24.5  | 9/6  | -0.4 | 2.1      | 0.12     | 0.2         | 3         | -0.7 ± 0.3                                              |
| 83.86               | -2.6   | 9/8  | -2.6 | 2.2      | 0.08     | 0.34        | 3         | -1.2 ± 0.6                                              |
| <b>Ice surface</b>  |        |      |      |          |          |             |           |                                                         |
| 89.61               | 16.8   | 8/14 | 0.0  | 1.3      | 0.08     | 0.16        | 4         | 0                                                       |
| 89.92               | 67.6   | 8/16 | -    | 2.2      | 0.07     | 0.26        | 4         | -2.3 ± 2.1                                              |
| 89.11               | -150.0 | 8/19 | 0.0  | 1.6      | 0.12     | 0.29        | 3         | 0.3 ± 0.3                                               |
| 88.74               | -137.1 | 8/21 | 0.1  | 3        | 0.10     | 0.4         | 3         | 0.7 ± 0.3                                               |

Table S2. Air-snow and air-ice chamber flux measurements made with the EGM-4 chamber flux system, surface (snow or ice) temperature, floe depth, snow depth and freeboard.
